# Supplementary material for: Implementation of an Ultrasound Guided Peripheral Intravenous (USGPIV) Educational Curriculum in a Pediatric Emergency Department
Source: Research Square preprint supplement (doi:10.21203/rs.3.rs-8427833/v1), 2026-02-09
Supplement: Supplementary file 1 [file c0d4c2dae848efecae7cea50.docx]

Attachments: Supplements

**Figure 1: Technique for following USGPIV insertion:**


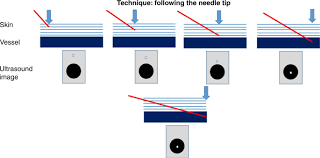


The vessel is identiﬁed with the ultrasound probe (blue arrow) in short axis view. The needle (red line) is advanced through the skin and identiﬁed as a bright echogenic spot under the ultrasound. The probe and needle are then advanced simultaneously or one after the other to always maintain visualization of the needle tip[33]

**Table 1:  Pretest/Posttest (Kaganovskaya et al) [24]**

1. The color of the vein on the ultrasound machine is

A) Black

B) Blue

C) White

D) Red or blue

2. The color of the artery on the ultrasound machine without Doppler flow is

A) Blue or red

B) Black

C) Blue

D) Red

3. The student would determine the difference between a vein and artery on an ultrasound by

A) Applying pressure to the vessel, and the vein collapses while the artery does not

B) Scanning over the neck area to see the large vessel

C) Rubbing the skin to help engulf the vessel with the ultrasound probe

D) Applying pressure to the vessel, and the artery collapses while the vein does not

4. The image presented on the screen of the ultrasound machine is a result of:

A) High-frequency sound waves emitted from the transducer bouncing back off structures toward the transducer

B) Vibrations emitted from transducer that disturb permeable vascular structures

C) Micro amounts of nonionizing radiation waves that are emitted from end of transducer

D) Vibrations that channel energy into the plastic antenna in the probe

5. The benefits of ultrasound peripheral IV insertion include the following except:

A) increased patient satisfaction

B) increased rate of successful cannulations

C) decreased costs

D) increased costs

6. A student who is performing ultrasound-guided IV placement should utilize which view?

A) Long axis view

B) Short axis view

C) Parallel axis view

D) Grid view

7. When performing an insertion, the ultrasound probe should be held with:

A) The dominant hand

B) The nondominant hand

C) It does not matter

D) Both hands

8. Identify which picture demonstrates a short axis view:

A                                    B


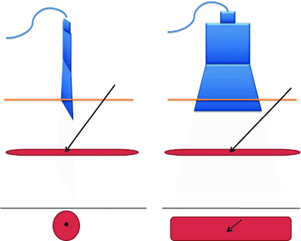


9. In a short axis ultrasound image, arteries are different from veins in that

A) Arteries are smaller than veins and not compressible

B) Arteries are usually twice the diameter of veins

C) Arteries are pulsatile circular structures

D) Arteries can only be differentiated by blood oxygenation imaging

**Table 2: Ultrasound Guided Peripheral Intravenous Catheter Insertion Competency**

**Name: _____________________________________________ ____________**

#1: ______/______/______ Preceptor Signature:____________________________

#2:______/______/______ Preceptor Signature:____________________________

#3 ______/______/______ Preceptor Signature:____________________________

#4:______/______/______ Preceptor Signature:____________________________

#5: ______/______/______ Preceptor Signature:____________________________

|  | **Procedure Steps** | **Met** | **Not Met** |
| --- | --- | --- | --- |
| 1 | Verifies physician’s order for Ultrasound Guided Peripheral IV (PIV) insertion/lab work. Print lab labels if applicable. |  |  |
| 2 | Cleans hands |  |  |
| 3 | Introduces self and verifies correct patient. Explains procedure. |  |  |
| 4 | Gathers and prepares appropriate supplies. |  |  |
| 5 | Identifies most appropriate extremity.   1. Select patient’s non dominate arm, if possible 2. Avoid extremities that may have compromised circulation, such as the presence of lymphedema or venous congestion |  |  |
| 6 | Positions patient appropriately. Turns on Ultrasound machine and adjusts settings accordingly for best clarity. Inserts patient information |  |  |
| 7 | Applies clean ultrasound gel to proposed site and positions probe on forearm area with correct probe orientation. |  |  |
| 8 | Locates veins by using light pressure, slowly moving probe over the general location of the vessel. Identifies vein(s) and verbalizes viability.   1. Avoids veins that are sclerotic 2. Notes vessel depth and adjusts magnification/depth accordingly 3. Correctly adjusts gain and focal zone 4. Describes ways to differentiate vein from artery 5. Demonstrates ability to save image of vein |  |  |
| 9 | Visualizes other structures and identifies accordingly (arteries pulsate; nerve complexes appear as “honeycomb-like”, encapsulated objects) |  |  |
| 11 | Assembles supplies and cleanses site with chlorhexidine gluconate swab/pad or alcohol pad. |  |  |
| 12 | Applies tourniquet and dons’ clean gloves. |  |  |
| 13 | Applies gel/lubricant 1” above the injection site and positions the probe to visualize the vein centered on the screen according to guide markings. |  |  |
| 14 | Demonstrates ability to correctly identify needle tip within subQ tissue.  Describes the difference between in-plane and out-of-plane approaches |  |  |
| 15 | Demonstrates ability to “track the needle tip” using the out-of-plane approach by series of maneuvers – seeing the needle tip, advancing the probe to lose the tip, advancing the needle tip back into the field of view, etc. until the needle tip is seen within the vessel lumen (“target sign”) |  |  |
| 16 | Demonstrates ability to flatten the needle tip and advance the needle tip within the vessel lumen |  |  |
| 17 | Describes the reason why it is important to visualize losing the needle tip at times by advancing the probe just past the needle tip |  |  |
| 18 | Demonstrates good technique of holding the probe (anchoring, etc.) |  |  |
| 19 | Attaches NS flush to the IV catheter tubing and withdraws to elicit blood return, then flushes with NS or withdraws blood specimen. |  |  |
| 20 | Cleans site free of blood using gauze. |  |  |
| 21 | Applies occlusive dressing and secures catheter per hospital policy. |  |  |
| 22 | Returns bed to safe, low, locked position. |  |  |
| 23 | Discards used supplies/sharps, per policy. |  |  |
| 24 | Cleans ultrasound machine/probe with germicidal disposable cloths, discards gloves, and washes hands. |  |  |
| 25 | Informs primary RN of IV location and any complications encountered. |  |  |
| 26 | Documents per policy in EPIC |  |  |

Courtesy of Moore C., Duran-Gehring P, Vinograd A. [9, 16, 19, 21]

**Box 1: Ultrasound-guided peripheral intravenous (USGPIV) access policy**

| **Scope:** Registered Nurses, and Advanced Practice Providers |
| --- |
| **Physician order:** Not required |
| **Definition:**  USGPIV uses a live feed ultrasound screen that documents peripheral intravenous (PIV) cannulation from skin puncture through venipuncture via direct visualization on an ultrasound monitor for the health care provider performing the skill in real time. USGPIV fills a gap in patient care between traditional PIV access methods of vein visualization and/or palpation and ultrasound-guided or blind central venous access.  This policy is for the establishment of PIV access in patients with difficult access using USGPIV in a safe manner. |
| **Purpose:**  USGPIV is used for identification of vasculature and successful placement of PIV catheters in pediatric patients with difficult PIV access.  These patients are those: |
| Who require IV access to administer medications, fluids, and/or blood products that do not require central venous access |
| Who have peripheral vasculature that is difficult to visualize and/or palpate |
| Who have undergone 2 unsuccessful traditional visualization and/or palpation PIV access attempts |
| Who are otherwise poor candidates for additional peripheral vascular access methods |
| Who are otherwise not candidates for central venous access |
| **Qualifications:**  USGPIV is an advanced skill that requires additional training beyond traditional visualization and/or palpation techniques.  An advanced practitioner, registered nurse and/or pediatric emergency medicine fellow is required to attend education and skill training and demonstrate validated competency in use of USGPIV techniques that include: |
| **Initial training** |
| Initial training that covers vessel anatomy, ultrasound science, USGPIV approach techniques, review of USGPIV policy, procedure, protocol, competency checklist, and access log |
| Completion of USGPIV pre and post quiz |
| Initial skills training with ultrasound machine, phantom gel model, and vessel identification on live patient volunteers or students |
| Completion of USGPIV training module, IExcel hands-on session and five successful live-patient USGPIV catheter insertions proctored by a USGPIV facilitator |
| Annual recertification  Five documented successful USGPIV catheter insertions quarterly or  Completion of the initial USGPIV training module annually |

*Adapted from R. Laksonen et al Nursing Clin N Am 2015;50:777 [12]

**Box 2: Performance criteria to evaluate competency for US-guided peripheral IV insertion**

| Competency | Performance criteria |
| --- | --- |
| Assessment of patient | Assesses patient for need to utilize US-guided IV access |
| Reviews most recent H & P, medications and allergies |
| Confirms patient identification armband |
| Planning for procedure | Collects necessary supplies, personal protective equipment, and sets up as needed |
| Explains procedure to parent & child |
| Patient safety | Differentiates and identifies arteries versus veins using ultrasonography |
| Utilizes appropriate infection-control measures to reduce risk of line infection |
| Determines the depth of the target vein utilizing depth scale on US device and selects the appropriate length IV catheter |
| Removes tourniquet promptly when indicated |
| Monitors line patency and infusion to detect S & S of infiltration |
| Evaluation | Confirms blood return, easy flush, and absence of swelling or tenderness at site |
| Documents use of US for IV placement, catheter size, length, location, and site condition |
| Labels IV site with insertion date, catheter size |
| Reevaluates site frequently for signs of infiltration |
| Evaluates patient’s response to procedure |

*Adapted from R. Laksonen et al Nursing Clin N Am 2015;50:777 [12]
